# Supplementary material for: An alternative peptone preparation using Hermetia illucens (Black soldier fly) hydrolysis: process optimization and performance evaluation
Source: PeerJ journal article supplement (doi:10.7717/peerj.16995), 2024-02-26
Supplement: supplemental_file.pdf [file supplemental_file.pdf]

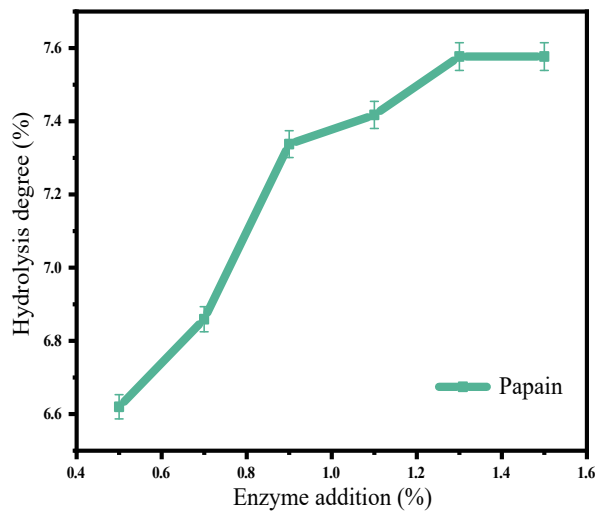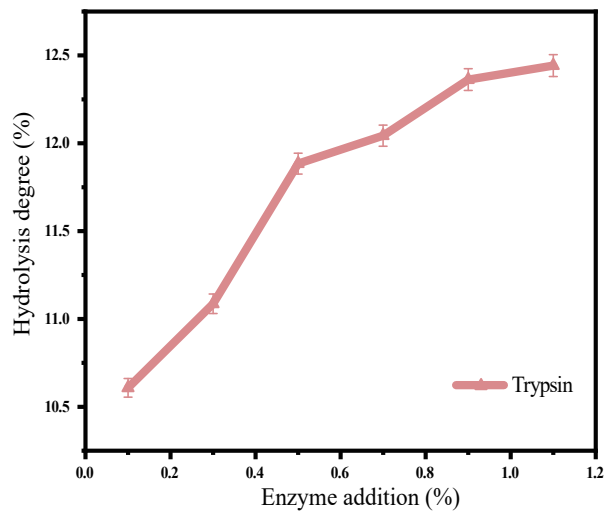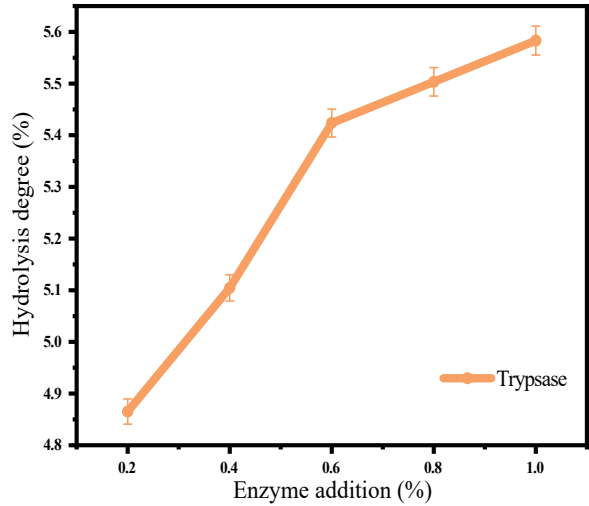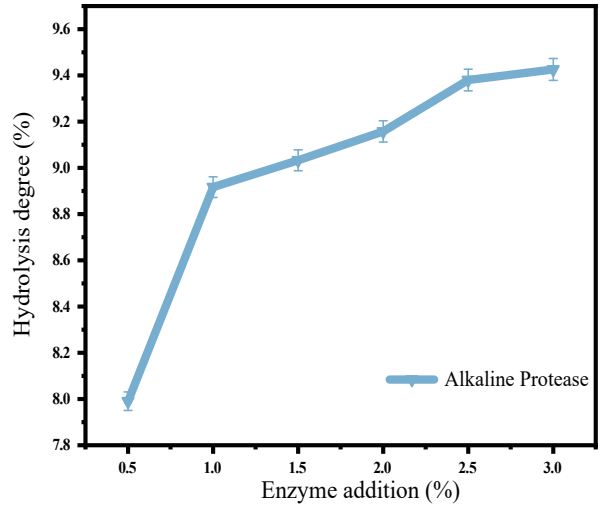

Effect of enzyme addition on the degree of hydrolysis of four enzymes

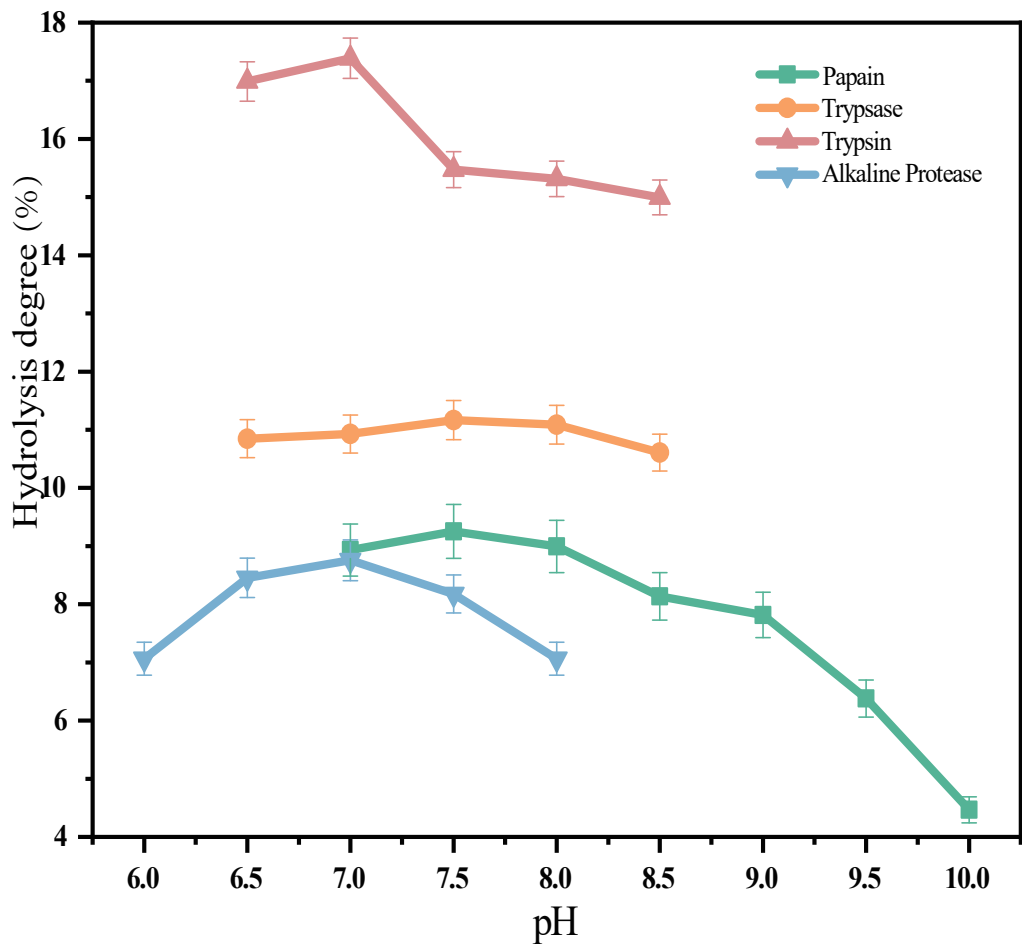

Effect of pH on the degree of hydrolysis of four enzymes

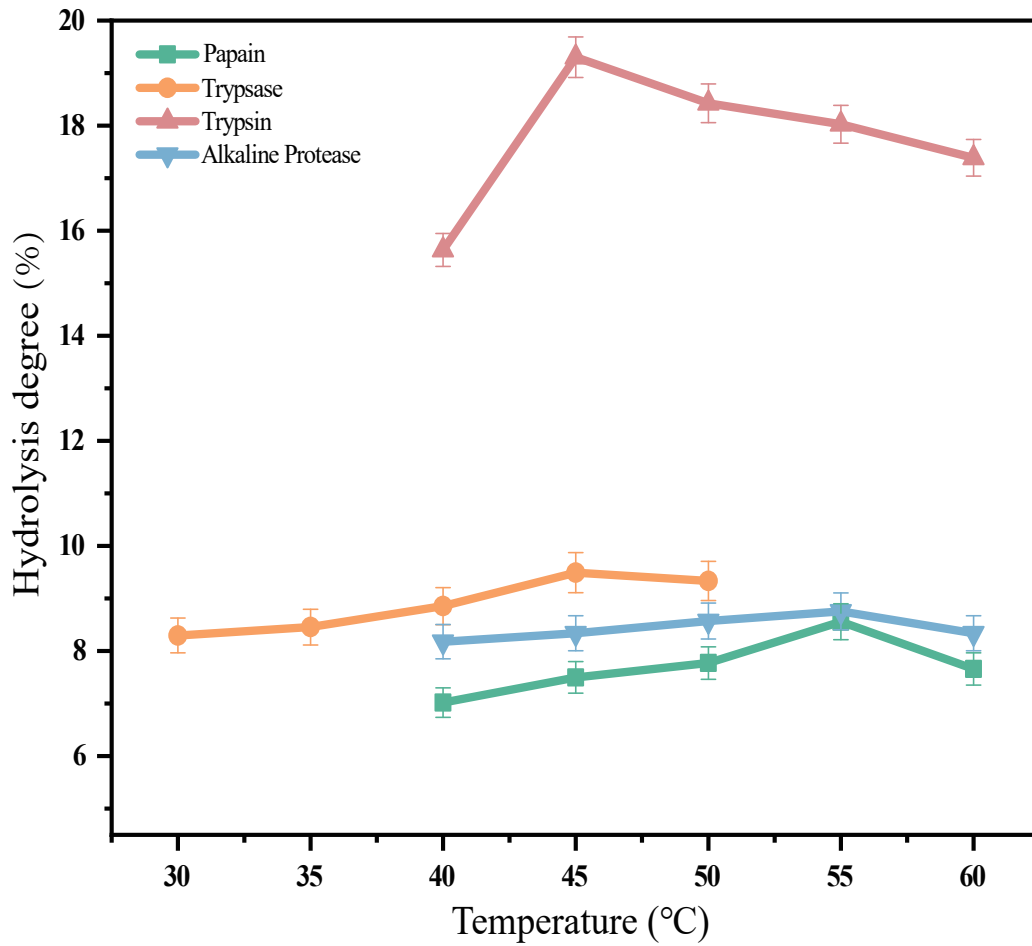

Effect of temperature on the degree of hydrolysis of four enzymes

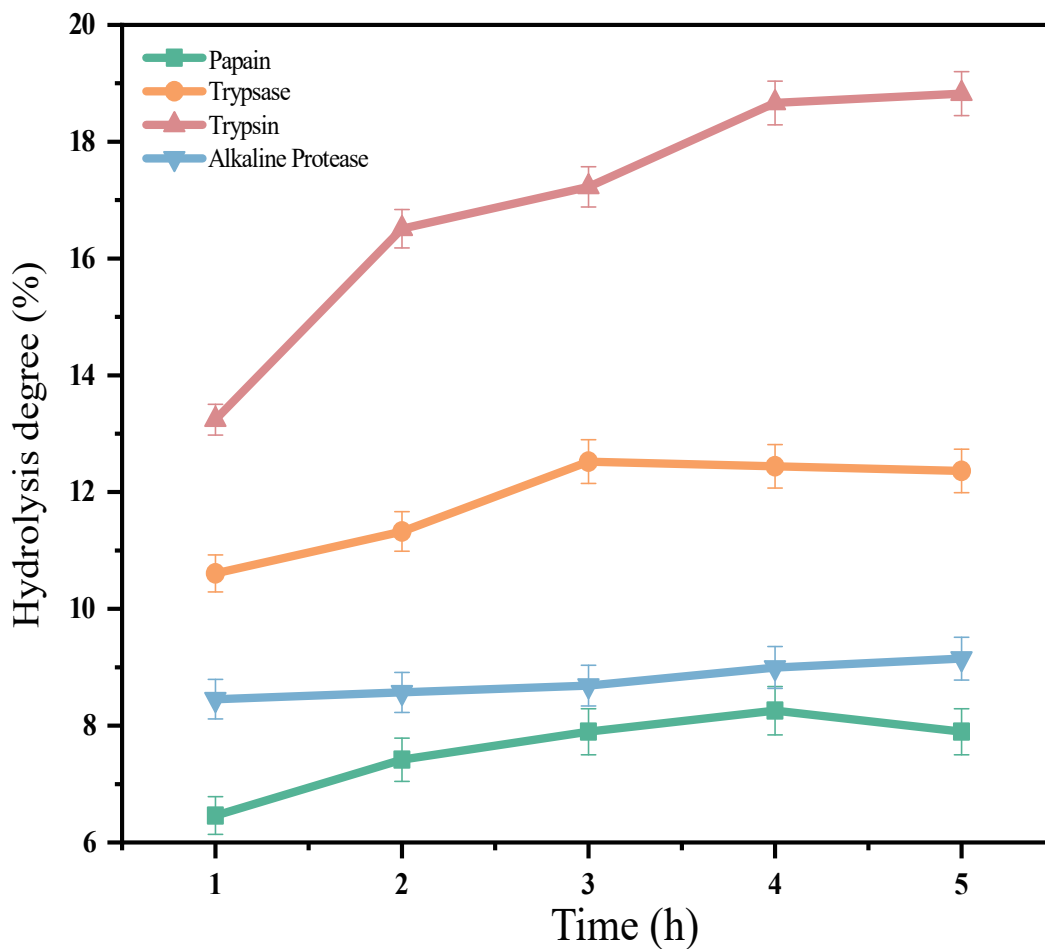

Effect of time on the degree of hydrolysis of four enzymes

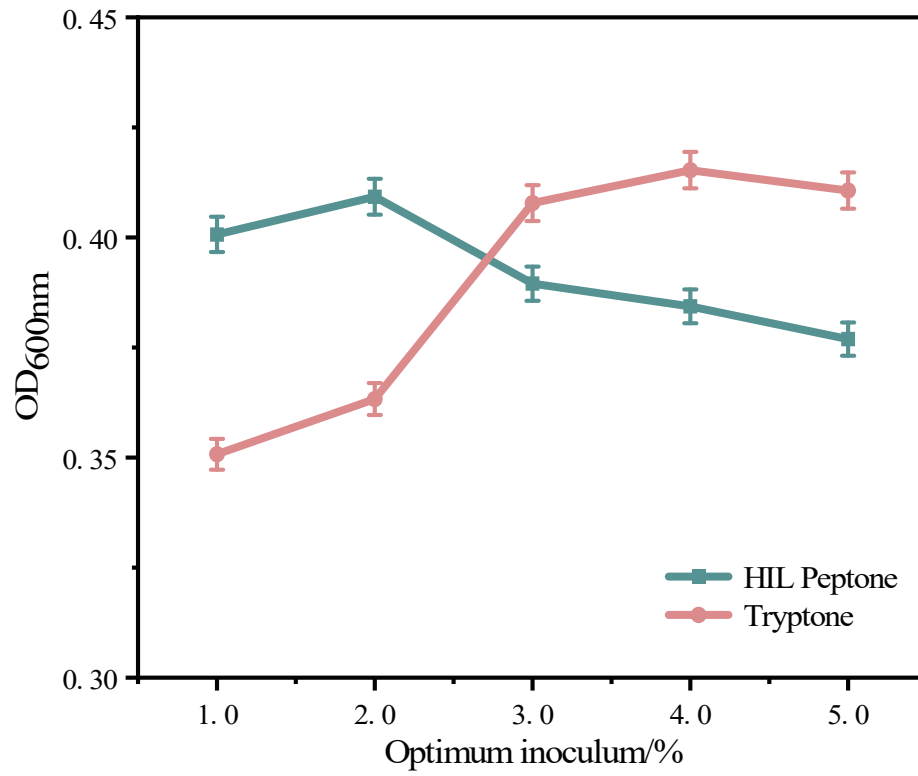

Determination of optimal inoculum size of *Escherichia coli*
